# Supplementary material
Source: publisher figshare collection journal article supplement (https://acs.figshare.com/ndownloader/files/3769714)
Supplement: Supplementary file 1 [file 3769714]

# Simultaneous Reduction of Metal Ions by Multiple Reducing Agents Initiate the Asymmetric Growth of Metallic Nanocrystals

Mahmoud A. Mahmoud

*Laser Dynamics Lab., School of Chemistry and Biochemistry, Georgia Institute of Technology,  
Atlanta, Georgia 30332-0400*

\*E-mail:mmahmoud@gatech.edu

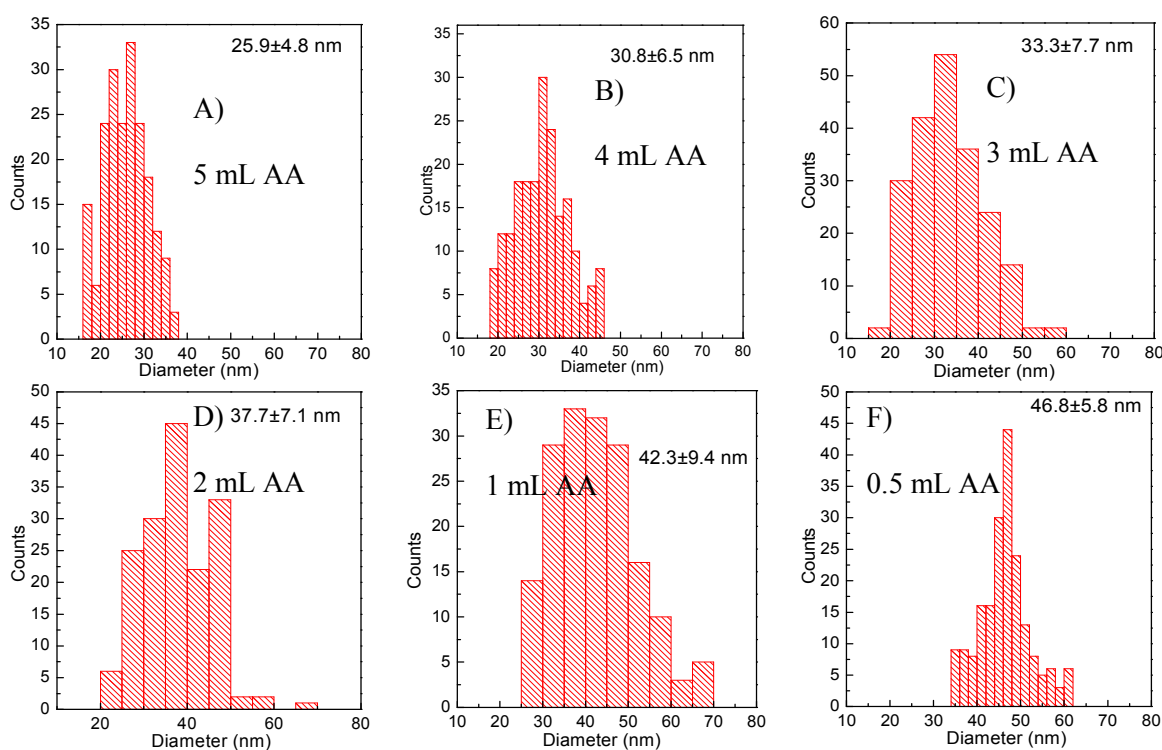

Figure S1 Statistical analysis of the diameters of AgNDs prepared by SMART at different concentrations of AA; the amount of AA was decreased from Figure 1 A through F. ImageJ was used to determine the diameters of the AgNDs measured from 3 TEM images for each batch.

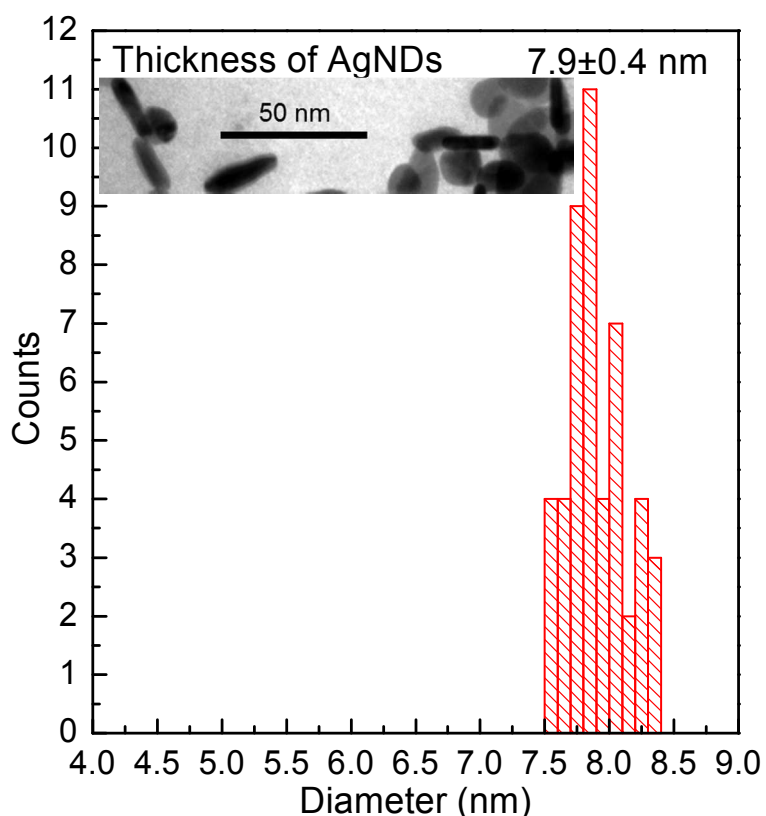

Figure S2 Statistical analysis of the thickness of the 30.8±6.5 nm AgNDs, prepared by SMART. The analysis carried out for 48 particles measured from 5 TEM images. The inset is TEM image of the 30.8±6.5 nm AgNDs. The thickness of the AgNDs was found to be 7.9±0.2 nm

Table S1. The final concentration of silver nitrate, polyvinyl pyrrolidone (PVP, MW=55,000), L-ascorbic acid, and sodium borohydride after mixing them.

| Diameter of AgNDs (nm) | Silver Nitrate (mM)    | PVP (mM)               | L-Ascorbic Acid (mM) | Sodium Borohydride (mM) |
|------------------------|------------------------|------------------------|----------------------|-------------------------|
| 25.9±4.8               | 17.89×10 <sup>-2</sup> | 14.41×10 <sup>-2</sup> | 0.194                | 29.82×10 <sup>-4</sup>  |
| 30.8±6.5               | 17.85×10 <sup>-2</sup> | 14.38×10 <sup>-2</sup> | 0.387                | 29.74 ×10 <sup>-4</sup> |
| 33.3±7.7               | 17.76×10 <sup>-2</sup> | 14.31×10 <sup>-2</sup> | 0.770                | 29.60×10 <sup>-4</sup>  |
| 37.7±7.1               | 17.67×10 <sup>-2</sup> | 14.24×10 <sup>-2</sup> | 1.149                | 29.45×10 <sup>-4</sup>  |
| 42.3±9.4               | 17.58×10 <sup>-2</sup> | 14.17×10 <sup>-2</sup> | 1.524                | 29.31×10 <sup>-4</sup>  |
| 46.8±5.8               | 17.50×10 <sup>-2</sup> | 14.10×10 <sup>-2</sup> | 1.896                | 29.17×10 <sup>-4</sup>  |

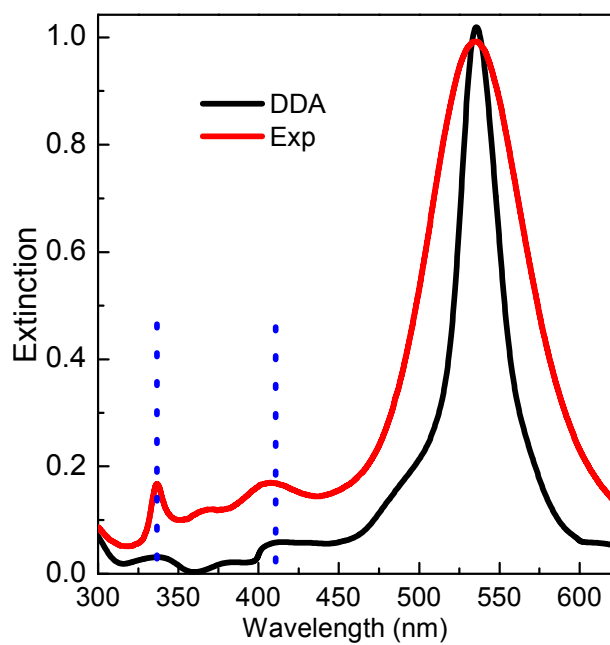

Figure S3. LSPR spectrum of 30 nm AgND of 8 nm thickness calculated by DDA technique (black) and LSPR spectrum measured for  $30.8 \pm 6.5$  nm AgNDs.
